# Supplementary material for: Lipid profile of bovine grade-1 blastocysts produced either in vivo or in vitro before and after slow freezing process
Source: Sci Rep. 2021 Jun 2;11:11618. doi: 10.1038/s41598-021-90870-8 (PMC8172931; doi:10.1038/s41598-021-90870-8)
Supplement: Supplementary file 1 — Supplementary Information 1. [file 41598_2021_90870_MOESM1_ESM.xlsx]

## Sheet: Feuil1
	Article Title : Lipid profile of bovine grade-1 blastocysts produced either in vivo or in vitro before and after slow freezing process
	Authors: Sarah Janati Idrissi1*, Daniel Le Bourhis1, Antoine Lefevre2, Patrick Emond2, Laurene Le Berre1, Olivier Desnoës1, Thierry Joly3,4, Samuel Buff4, Virginie Maillard5, Laurent Schibler1, Pascal Salvetti1, Sebastien Elis5* 1 Allice, 37380 Nouzilly, France; 2 Université de Tours, PST Analyse des systèmes biologiques, 37044 Tours Cedex 9, France; 3 Univ Lyon, Université Claude Bernard Lyon 1,…
	Supplementary Table 1 : List of differential features
	Legend:	Eight Holstein heifers enabled the production of in vitro and in vivo embryos by OPU-IVF and embryo collection procedures. After seven days of development, all grade 1 blastocysts were biopsied and sexed. Half of each group underwent lipid extraction in a fresh state, the other half were first frozen before undergoing lipid extraction. Lipid extracts were analysed by liquid chromatography-high re…

## Sheet: supp Table1
		origin effect: in vivo versus in vitro produced embryos
		freezing effect: fresh versus frozen in vivo produced embryos
		freezing effect: fresh versus frozen in vitro produced embryos
		Lipids annotated according to SimLipid database
		Lipids annotated according to Lipid Map
				VITRO VS VIVO FRESH				FRESH VS FROZEN VIVO				FRESH VS FROZEN VITRO
Observed m/z	Exact m/z	Delta	Ion	p.ajusted	mean vitro	mean vivo	FC vitro/vivo	p.ajusted	mean frozen	mean fresh	FC frozen/fresh	p.ajusted	mean frozen	mean fresh	FC frozen/fresh	ID	annotation common name	annotation main class	subclass	formula
1199.78				0.006878	4.54522e-05	7.10124e-05	0.64006									M1200T745	ND	ND	ND	ND
1215.75				0.017109	0.00041925	0.000595249	0.704327									M1216T745	ND	ND	ND	ND
1342.93				0.001874	0.000173266	0.000382419	0.453079									M1343T825	ND	ND	ND	ND
1347.88				0.001874	0.000145168	0.000338178	0.429265									M1348T825	ND	ND	ND	ND
1363.86				0.001874	9.24187e-05	0.000214917	0.43002									M1364T825	ND	ND	ND	ND
256.227	256.2271	0.0003	[M + NH4]+	0.035178	0.000263001	0.000130032	2.02259									M256T266	ND	Fatty Acids	Unsaturated fatty acids	C15H26O2
256.227	256.2271	0.0003	[M + NH4]+	0.035178	0.000263001	0.000130032	2.02259									M256T266	ND	Fatty esters	Wax monoesters	C15H26O2
256.227	256.2271	0.0003	[M + NH4]+	0.024466	0.000263001	0.000130032	2.02259									M256T337	ND	Isoprenoids	C15 isoprenoids	C15H26O2
256.227	256.2271	0.0003	[M + NH4]+	0.024466	0.000237318	0.000116063	2.04473									M256T337	ND	Fatty Acids	Unsaturated fatty acids	C15H26O2
256.227	256.2271	0.0003	[M + NH4]+	0.024466	0.000237318	0.000116063	2.04473									M256T337	ND	Fatty esters	Wax monoesters	C15H26O2
258.28	258.2791	0.0004	[M + NH4]+	0.042211	6.5826e-05	2.42886e-05	2.71016									M258T149	ND	Fatty alcohols	ND	C16H32O
258.28	258.2791	0.0004	[M + NH4]+	0.042211	6.5826e-05	2.42886e-05	2.71016									M258T149	ND	Fatty aldehydes	ND	C16H32O
264.254				0.013144	0.000681777	0.000378395	1.80176									M264T147	ND	ND	ND	ND
271.227	271.227	0.0002	[M + H]+	0.0015546	0.000466292	0.00018622	2.50398									M271T270_1	keto palmitic acid	Fatty acids	Oxo fatty acids	C16H30O3
272.222	272.2220	0.0003	[M + NH4]+	0.0064368	0.000244196	0.000159917	2.3658									M272T356	Methyl 7-oxo-11E-tetradecenoate	Fatty esters	Wax monoesters	C15H26O3
272.222	272.2220	0.0002	[M + NH4]+	0.0032678	0.000260413	0.000110074	1.52702									M272T88	Methyl 7-oxo-11E-tetradecenoate	Fatty esters	Wax monoesters	C15H26O3
273.222	273.2189	0.0026	[M + Na]+	0.010181	0.000370146	0.000117695	3.14496					0.0079941	0.000122976	0.000370146	0.332236	M273T253	3,4,7,11-Tetramethyl-6E,10Z-tridecadienal	Fatty aldehydes		C17H30O
273.222	273.2213	0.0002	[M + H]+	0.010181	0.000370146	0.000117695	3.14496					0.0079941	0.000122976	0.000370146	0.332236	M273T253	5alpha-androst-16-en-3-one	steroids	C19 steroid	C19H28O
274.881				0.0043708	0.000458768	0.000257177	1.78386									M275T69	ND	ND	ND	ND
276.879				0.0035952	0.000296818	0.000167308	1.77408									M277T69	ND	ND	ND	ND
284.91				0.036913	0.00136499	0.000719207	1.89791									M285T70	ND	ND	ND	ND
286.907				0.030288	0.000311711	0.000169207	1.84219									M287T70	ND	ND	ND	ND
289.253	289.2526	0.0003	[M + H]+	0.02956	0.000344433	0.000171425	2.00923									M289T214	ND	Fatty aldehydes	ND	C20H32O
289.253	289.2526	0.0003	[M + H]+	0.02956	0.000344433	0.000171425	2.00923									M289T214	nd	Fatty alcohols	ND	C20H32O
289.274				0.035178	0.000371098	0.000219694	1.68916									M289T232	ND	ND	ND	ND
294.939				0.0012334	0.00195531	0.000996741	1.9617									M295T70	ND	ND	ND	ND
296.316	297.3152	0.0005	[M + H]+					0.014579	2.66e-05	4.14e-05	0.6418					M297T244	NA	NA	NA	C20H40O
301.901				0.017109	0.000605144	0.000356921	1.69546									M302T70	ND	ND	ND	ND
310.238	310.2377	0.0004	[M + NH4]+					0.0076712	4.52e-05	8.33e-05	0.542854					M310T151	FA(18:4;O)	NA	NA	C18H28O3
310.238	310.2377	0.0004	[M + NH4]+					0.0076712	4.52e-05	8.33e-05	0.542854					M310T151	Panaquinquecol 1	Fatty alcohols	NA	C18H28O3
309.976				0.002779	8.96451e-05	4.36332e-05	2.05452									M310T1617	ND	ND	ND	ND
311.929				0.032612	0.000840409	0.000518455	1.62099									M312T71	ND	ND	ND	ND
313.144	313.1410	0.0029	[M + Na]+	0.042211	0.000103398	6.81636e-05	1.51691									M313T127	clavirin	eicosanoid	Clavulones	C17H22O4
315.326	315.3258	0.0005	[M + H]+					0.018823	6.11e-05	9.8e-05	0.623802					M315T245	FOH(20:0;O)	Fatty alcohols	NA	C20H42O2
324.217	324.2145	0.0028	[M + Na]+	1.0206e-05	0.000392543	0.000908825	0.431924									M324T137	ND	fatty esters	fatty acyl carnitine	C16H31NO4
324.327				0.035178	0.000113895	6.67146e-05	1.7072									M324T368	ND	ND	ND	ND
326.379				0.028194	0.00845336	0.000577712	14.6325									M326T154	ND	ND	ND	ND
336.327	336.3261	0.0004	[M + H]+	0.048101	0.000203374	0.00011503	1.76801									M336T196	Pipericine	Fatty amides	N-acyl amines	C22H41NO
336.311	336.3108	0.0005	[M + NH4]+	0.014	0.00347322	0.00198986	1.74546									M336T201	1-O-(2R-hydroxy-pentadecyl)-sn-glycerol	Monoradylglycerols	Monoalkylglycerols	C18H38O4
337.33				0.02956	3.61851e-05	2.31477e-05	1.56323									M337T196	ND	ND	ND	ND
336.852				0.026559	8.49742e-05	4.63044e-05	1.83512									M337T69	ND	ND	ND	ND
344.866				0.032612	0.000171317	0.000108168	1.5838									M345T69	ND	ND	ND	ND
345.132				0.026559	0.000171317	0.000108168	1.5838									M345T74	ND	ND	ND	ND
349.216	349.2162	0.0004	[M + H]+					0.026903	2.37e-05	4.18e-05	0.567861					M349T238	6,9,12,15,18-Tetracosapentaynoic acid	Fatty Acids	Unsaturated fatty acids	C24H28O2
349.216	349.2138	0.0020	[M + Na]+					0.026903	2.37e-05	4.18e-05	0.567861					M349T238	NA	Fatty Acids	Unsaturated fatty acids	C22H30O2
352.358				0.024466	9.44097e-05	5.17424e-05	1.82461									M352T465	ND	ND	ND	ND
354.895				0.00099367	0.000456082	0.000271185	1.68181									M355T70	ND	ND	ND	ND
357.337	357.3363	0.0005	[M + H]+					0.014579	0.000232787	0.000392566	0.592989					M357T328	NA	Fatty Acids	Hydroxy fatty acids	C22H44O3
362.927				0.00020837	0.00027767	0.000176027	1.57743									M363T71	ND	ND	ND	ND
368.317	368.3159	0.0006	[M + H]+	0.020659	0.000218307	0.000108913	2.00442									M368T270	N-oleoyl GABA	Fatty amides	N-acyl amides	C22H41NO3
368.389	368.3159	0.0006	[M + NH4]+	0.0002806	0.000148925	0.000249338	0.597282									M368T666	15-tetracosenal	Fatty aldehydes	ND	C24H46O
368.389	368.3159	0.0006	[M + NH4]+	0.0002806	0.000148925	0.000249338	0.597282									M368T666	17-tetracosenal	Fatty aldehydes	ND	C24H46O
368.872				0.00052935	0.000246026	0.000140897	1.74614									M369T70	ND	ND	ND	ND
369.241	369.2400	0.0009	[M + Na]+					0.029424	5.62e-05	3.48e-05	1.61575					M369T254	FA(22:5;O)	NA	NA	C22H34O3Na
369.241	369.2424	0.0015	[M + H]+					0.029424	5.62e-05	3.48e-05	1.61575					M369T254	ST(24:5;O3)	Bile acids and derivatives	C24 bile acids, alcohols, and derivatives	C24H32O3
376.343	376.3421	0.0007	[M + NH4]+					0.031219	0.000742789	0.000386234	1.92316					M376T330	MG(18:0)	Monoradylglycerols	Monoacylglycerols	C21H42O4
378.901				0.019423	0.000412096	0.000224696	1.83402									M379T71	ND	ND	ND	ND
379.283	379.2819	0.0007	[M + Na]+					0.036376	5.02e-05	8.39e-05	0.598155					M379T368	Heneicosanedioic acid	Fatty Acids	Dicarboxylic acids	C21H40O4
379.917				0.00019292	0.000859769	0.000502911	1.70958									M380T71	ND	ND	ND	ND
382.405				0.00012782	1.817e-05	3.91913e-05	0.463623									M382T691	ND	ND	ND	ND
386.327	386.3265	0.0006	[M + NH4]+	0.013144	0.000513572	0.000247499	2.07505									M386T285	Octadecyl fumarate	Fatty esters	Wax monoesters	C22H40O4
389.112	389.1029	0.0095	[M + Na]+	0.016137	0.000165271	0.000106709	1.5488									M389T142	Ixoside	Steroid conjugates	sulfate	C18H22O6S
409.272				0.019423	5.48934e-05	2.61076e-05	2.10258									M409T378	ND	ND	ND	ND
413.267	413.2662	0.0007	[M + Na]+	0.043482	0.000816473	0.000478327	1.70693									M413T369	NA	Bile acids	C24 bile acids, alcohols and derivatives	C24H38O4
414.869				0.021963	0.000827815	0.000530807	1.55954									M415T71	ND	ND	ND	ND
416.865				0.048101	0.000210351	0.000136266	1.54368									M417T70	ND	ND	ND	ND
421.318	421.3179		[M]+	0.00042567	0.000366201	0.000921957	0.3972									M421T90	O-palmitoleoylcarnitine
424.364	424.3550	0.0091	[M + Na]+	0.001874	0.00485073	0.00267094	1.81611	0.035133	0.000196191	0.000121717	1.61186					M424T191	N-propyl-16,16-dimethyl-5Z,8Z,11Z,14Z-docosatetraenoyl amine	Fatty amides	N-acyl amides	C27H47NO
424.283				0.030288	0.000277637	0.000121717	2.281									M424T270	ND	ND	ND	ND
424.825				0.00020837	0.000145874	8.00469e-05	1.82236									M425T1616	ND	ND	ND	ND
427.291	427.2819	0.0095	[M + Na]+					0.0070374	6.42701e-05	3.79917e-05	1.69169					M427T329	MG(22:5)	Monoradylglycerols	Monoacylglycerols	C25H40O4
427.291	427.2819	0.0095	[M + Na]+					0.0070374	6.42701e-05	3.79917e-05	1.69169					M427T329	ST(25:2;O4)	Bile acids and derivatives	C25 bile acids, alcohols, and derivatives	C25H40O4
432.238	432.2381	0.0003	[M + NH4]+	0.0064368	0.0123234	0.035451	0.347617									M432T86	19-oxodesacetylcinobufagin	Sterols	Bufanolides	C24H30O6
437.876				0.044823	0.000395199	0.000257295	1.53598									M438T70	ND	ND	ND	ND
443.269	443.2768	0.0081	[M + Na]+					0.014857	0.000380309	0.000237582	1.60075					M443T329	Homodeoxycholic acid	Bile acids and derivatives	C25 bile acids, alcohols, and derivatives	C25H40O5
444.332				0.035178	0.000123036	4.84094e-05	2.54157									M444T137	ND	ND	ND	ND
444.421	444.4200	0.0007	[M + NH4]+	0.04662	0.000105914	3.2829e-05	3.22623									M444T682	ND	Sterols	NA	C30H50O
448.291				0.0015371	0.000595564	0.000352938	1.68745									M448T161	ND	ND	ND	ND
447.904				0.017109	0.000187134	0.000455878	0.410491									M448T71	ND	ND	ND	ND
449.286	449.2898	0.0042	[M + H]+					0.0049301	8.58263e-05	4.91251e-05	1.7471					M449T329	Ethyl-diacetoxy-(6E,8E,10E,14Z)-eicosatetraenoate)	Eicosanoids	ND	C26H40O6
453.394	453.3938	0.0001	[M + H]+					0.0048804	7.10864e-05	3.91806e-05	1.81433					M453T313	2-Hydroxy-24-keto-octacosanolide	Fatty esters	Lactones	C28H52O4
458.234				0.023177	0.000118999	0.000231677	0.513642									M458T85	ND	ND	ND	ND
482.856				0.04662	0.000429883	0.000280666	1.53166									M483T71	ND	ND	ND	ND
483.225								0.0012562	9.87593e-05	6.30545e-05	1.56625					M483T254	ND	ND	ND	ND
484.853				0.0064368	0.000132155	8.64463e-05	1.52875									M485T70	ND	ND	ND	ND
492.885				0.026559	0.000672053	0.000405936	1.65556									M493T71	ND	ND	ND	ND
496.34	496.3398	0.0006	[M+H]+					4.7146e-10	5.24815e-06	0.000325934	0.0161019	3.7717e-09	5.03975e-05	0.000538749	0.0935455	M496T172	LPC(16:0)	Glycerophosphocholines	Monoacylglycerophosphocholines	C24H50NO7P
500.215								0.0072022	8.79873e-05	5.7747e-05	1.52367					M500T254	ND	ND	ND	ND
509.279				0.0064368	0.000949841	0.00158276	0.600117	0.047788	0.00104278	0.00158276	0.658836					M509T132	NA	NA	NA	NA
517.205								0.011823	5.99153e-05	3.76228e-05	1.59253					M517T254	ND	ND	ND	ND
518.34	518.3476	0.0079	[M + NH4]+	0.0035952	5.02629e-05	9.91078e-05	0.507154	0.023214	6.05467e-05	9.91078e-05	0.610918					M518T132	Hippuristanolide	sterols	ND	C30H44O6
518.34	518.3476	0.0079	[M + NH4]+	0.0035952	5.02629e-05	9.91078e-05	0.507154	0.023214	6.05467e-05	9.91078e-05	0.610918					M518T132	Physalolactone B	Sterols	ND	C30H44O6
518.369	518.3687	0.0006	[M + NH4]+					0.017734	3.84515e-05	6.54945e-05	0.587095					M518T267	(25S)-5α-cholestan-3β,4β,6α,7α,8β,15β,16β,26-octol	Sterols	Cholesterol and derivatives	C27H48O8
518.369	518.3687	0.0006	[M + NH4]+					0.017734	3.84515e-05	6.54945e-05	0.587095					M518T267	TG(18:0(11S-acetoxy)/2:0/2:0)	Triradylglycerols	Triacylglycerols	C27H48O8
518.218			[M + NH4]+					0.017309	5.73192e-05	3.47368e-05	1.6501					M518T329	ND	ND	ND	ND
520.341	520.3398	0.0008	[M+H]+					1.6946e-07	0	6.97504e-05	0	9.0158e-07	3.13046e-06	0.000107075	0.0292362	M520T146	LPC(18:2)	Glycerophosphocholines	Monoacylglycerophosphocholines	C26H50NO7P
524.372	524.3711	0.0006	[M+H]+					7.0719e-09	1.21343e-05	0.000267127	0.0454252	3.1588e-08	4.02039e-05	0.000424925	0.0946142	M524T235	LPC(18:0)	Glycerophosphocholines	Monoacylglycerophosphocholines	C26H54NO7P
525.253	525.2459	0.0076	[M + Na]+	0.0064368	0.000336607	0.000598995	0.561953									M525T132	4beta-Hydroxywithanolide E	sterols	ND	C28H38O8
528.246								0.0086242	0.000159633	9.97171e-05	1.60085					M528T329	ND	ND	ND	ND
532.355				0.0015546	0.00179054	0.008148	0.219752									M532T132_1	ND	ND	ND	ND
532.384				7.4686e-06	6.51e-05	6.17352e-07	105.45									M532T132_2	ND	ND	ND	ND
534.286	534.2802	0.0055	[M + Na]+	0.035178	7.68031e-05	0.000144355	0.532043									M534T157	NA	Glycerophosphoserines	1-alkyl glycerophosphoserines	C23H46NO9P
534.286	534.2826	0.0031	[M + H]+	0.035178	7.68031e-05	0.000144355	0.532043									M534T157	PE(0:0/20:4;O2)	Oxidized glycerophospholipids	ND	C25H44NO9P
534.286	534.2802	0.0055	[M + Na]+	0.035178	7.68031e-05	0.000144355	0.532043									M534T157	PS(17:0/0:0)	Glycerophosphoserines	Monoacylglycerophosphoserines	C23H46NO9P
547.355	547.3507	0.0044	[M + NH4]+	0.048101	0.0001363	0.000213211	0.639273	0.014857	0.000134379	0.000213211	0.630262					M547T132_2	ND	Glycerophosphoethanolamines	Monoacylglycerophospho-ethanolamines	C27H48NO7P
547.346	547.3507	0.0048	[M + NH4]+					0.0086242	0.000125029	0.000215882	0.579156					M547T770	LysoPE(22:4)	Glycerophosphoethanolamines	Monoacylglycerophospho-ethanolamines	C27H48NO7P
547.346	547.3370	0.0089	[M + Na]+					0.0086242	0.000125029	0.000215882	0.579156					M547T770	PG(P-20:0/0:0)	Glycerophosphoglycerols	1Z-alkenylglycerophosphoglycerols	C26H53O8P
554.177				0.019423	0.000200962	0.000129821	1.54799									M554T260	ND	ND	ND	ND
556.443				0.044823	0.000168234	9.88577e-05	1.70178									M556T179	ND	ND	ND	ND
560.872				0.017928	0.000358361	0.000217485	1.64775									M561T71	ND	ND	ND	ND
571.25				0.0013036	0.00010864	0.000189023	0.574745	0.0074147	0.000124439	0.000189023	0.658325					M571T132	ND	ND	ND	ND
576.536	576.5326	0.0032	[M + Na]+	0.00052935	6.72671e-05	0.000125527	0.535878									M577T910	Cer(d18:0/17:0)	Ceramides	N-acylsphinganines	C35H71NO3
596.235								0.001623	6.08589e-05	3.55487e-05	1.71198					M596T329	ND	ND	ND	ND
600.469				0.044823	0.000113167	7.11206e-05	1.5912									M600T174	ND	ND	ND	ND
611.186				0.043482	0.00160229	0.000911927	1.75704									M611T792	ND	ND	ND	ND
625.408	625.4075	0.0008	[M + H]+					2.1844e-08	4.10503e-05	2.05417e-05	1.99839					M625T313	PG(12:0/13:0) / PG(13:0/12:0)	Glycerophosphoglycerols	Diacylglycerophosphoglycerols	C31H61O10P
628.196				0.0040948	0.000160766	0.000100844	1.5942									M628T332	ND	ND	ND	ND
637.305	637.3136	0.0082	[M + Na]+	0.031421	0.000207957	8.8478e-05	2.35038									M637T231	1,2-(8R,9R-epoxy-octadec-13Z,15Z-dien-4,6-diynoyl)-sn-glycerol	Triradylglycerols	Triacylglycerols	C38H46O7
644.496				0.048101	6.6494e-05	4.06037e-05	1.63763									M644T171	ND	ND	ND	ND
647.46	647.4646	0.0051	[M + Na]+					0.010061	0.0051222	0.0330651	0.154912					M647T1067	DG(37:7)	Diradylglycerols	Diacylglycerols	C40H64O5
647.46	647.4646	0.0051	[M + H]+					0.010061	0.0051222	0.0330651	0.154912					M647T1067	PA(32:1)	Glycerophosphates	Diacylglycerophosphates	C35H67O8P
647.391	647.3919	0.0013	[M + H]+					4.2507e-07	0.000127045	6.90597e-05	1.83964					M647T313	OHODA-PA	Oxidized glycerophospholipids	ND	C33H59O10P
647.391	647.3895	0.0011	[M+Na]+					4.2507e-07	0.000127045	6.90597e-05	1.83964					M647T313	PG(12:0/13:0) / PG(13:0/12:0)	Glycerophosphoglycerols	Diacylglycerophosphoglycerols	C31H61O10P
653.29				6.5167e-06	1.9557e-05	5.60384e-05	0.348993	0.01119	3.20657e-05	5.60384e-05	0.572211					M653T132	ND	ND	ND	ND
654.333	654.3378	0.0046	[M + Na]+	0.017928	0.00213607	0.000963423	2.21717	0.046042	0.00209566	0.000963422	2.17523					M654T231	OKOOA-PE	Oxidized glycerophospholipids		C31H54NO10P
654.333	654.3249	0.0082	[M + H]+	0.017928	0.00213607	0.000963423	2.21717	0.046042	0.00209566	0.000963422	2.17523					M654T231	PHHdiA-PS	Oxidized glycerophospholipids	Oxidized glycerophosphoserines	C29H52NO13P
669.335	669.3358	0.0006	[M + NH4]+	0.0064368	0.000172306	2.97673e-06	57.8843									M669T754	PKHdiA-PS	Oxidized glycerophospholipids	ND	C29H50NO13P
675.263				0.044823	0.000180276	7.9476e-05	2.26831									M675T231	ND	ND	ND	ND
679.42	679.4293	0.0094	[M + NH4]+	0.0064368	2.85834e-05	4.68081e-05	0.610651									M679T228	OHOHA-PC	Oxidized glycerophospholipids	ND	C33H60NO10P
679.42	679.4293	0.0094	[M + NH4]+	0.0064368	2.85834e-05	4.68081e-05	0.610651									M679T228	PKODA-PE	Oxidized glycerophospholipids		C33H60NO10P
685.205				0.002131	0.000994246	0.000556273	1.78733									M685T871	ND	ND	ND	ND
687.203				0.017109	0.00032828	0.000217701	1.50794									M687T871	ND	ND	ND	ND
697.367	697.3671	0.0002	[M + NH4]+	0.0053228	0.000227932	5.41705e-06	42.0768									M697T844	OHHdiA-PS	Oxidized glycerophospholipids	ND	C31H54NO13P
702.214				0.043482	0.000112613	7.07959e-05	1.59067									M702T418	ND	ND	ND	ND
708.512	708.5174	0.0052	[M + NH4]+	1.0206e-05	0.00398446	0.00845034	0.471515									M709T825	PG(P-16:0/15:1(9Z))	Glycerophosphoglycerols	1-(1Z-alkenyl).2-acylglycerophosphoglycerols	C37H71O9P
708.512	708.5174	0.0052	[M + H]+	1.0206e-05	0.00398446	0.00845034	0.471515									M709T825	PS(O-16:0/15:0)	Glycerophosphoserines	1-alkyl.2-acylglycerophosphoserines	C37H74NO9P
708.512	708.5174	0.0052	[M + H]+	1.0206e-05	0.00398446	0.00845034	0.471515									M709T825	PS(O-18:0/13:0)	Glycerophosphoserines	1-alkyl.2-acylglycerophosphoserines	C37H74NO9P
723.512	723.5048	0.0070	[M + Na]+	0.00019589	0.000134527	0.000250559	0.536907									M724T825	PE-Cer(d14:2(4E.6E)/22:1(13Z)(2OH))	Phosphosphingolipids	Ceramide phosphoethanolamines	C38H73N2O7P
723.512	723.5048	0.0070	[M + Na]+	0.00019589	0.000134527	0.000250559	0.536907									M724T825	PE-Cer(d16:2(4E.6E)/20:1(11Z)(2OH))	Phosphosphingolipids	Ceramide phosphoethanolamines	C38H73N2O7P
723.512	723.5171	0.0053	[M + H]+	0.00019589	0.000134527	0.000250559	0.536907									M724T825	PG(32:0)	Glycerophosphoglycerols	Diacylglycerophosphoglycerols	C38H75O10P
725.398				0.0037702	0.000216928	4.40944e-06	49.1963									M725T934	ND	ND	ND	ND
726.463	726.4680	0.0050	[M + Na]+	0.002131	0.00018013	0.000303672	0.593173									M726T825	PS(P-16:0/15:1(9Z))	Glycerophosphoserines	1-(1Z-alkenyl).2-acylglycerophosphoserines	C37H70NO9P
746.328				0.042211	0.000114489	4.54e-06	25.1963									M746T933	ND	ND	ND	ND
753.43				0.008259	0.000166791	3.52347e-06	47.3371									M753T1027	ND	ND	ND	ND
770.415	770.4086	0.0062	[M + NH4]+	0.0011695	9.95525e-05	0.000183468	0.542615									M770T825	OHOOA-PI	Oxidized glycerophospholipids	ND	C35H61O15P
774.359				0.040385	0.00013077	5.77223e-06	22.655									M774T1026	ND	ND	ND	ND
774.275								0.046042	8.46378e-05	5.62599e-05	1.50441					M774T1093	ND	ND	ND	ND
776.234				0.0035952	7.4129e-05	4.52319e-05	1.63887									M776T512	ND	ND	ND	ND
796.74	796.7389	0.0016	[M + NH4]+	0.036913	0.000235549	0.000156761	1.5026									M797T1373	TG(46:0)	Triradylglycerols	Triacylglycerols	C49H94O6
802.391				0.012207	0.0001038	6.07451e-06	17.0878									M802T1120	ND	ND	ND	ND
820.741	820.7389	0.0020	[M + NH4]+	0.042211	0.00023085	0.000146693	1.57369									M821T1357	TG(16:0/16:1/16:1)	Triradylglycerols	Triacylglycerols	C51H94O6
827.712	827.7083	0.0033	[M + NH4]+	0.031421	0.000118289	7.75681e-05	1.52497									M828T1376	GalCer(42:2)	Neutral glycosphingolipids	Simple Glc series	C48H91NO8
846.295								0.019983	7.78889e-05	4.44268e-05	1.75319					M846T1179	ND	ND	ND	ND
848.773	848.7702	0.0024	[M + NH4]+	0.0064368	0.000317738	0.000198022	1.60456									M849T1379	TG(16:0/16:1/18:1)	Triradylglycerols	Triacylglycerols	C53H98O6
852.804	852.8015	0.0021	[M + NH4]+	0.0076871	0.000127445	7.33554e-05	1.73736									M853T1411	TG(16:0/16:0/18:0)	Triradylglycerols	Triacylglycerols	C53H102O6
855.743	855.7396	0.0036	[M + NH4]+	0.041404	0.000130261	8.66395e-05	1.50348									M856T1395	GlcCer(44:2)	Neutral glycosphingolipids	Simple Glc series	C50H95NO8
934.643	934.6379	0.0055	[M + NH4]+	0.019423	0.000176445	0.000269215	0.655406									M935T459	PI(40:3)	Glycerophosphoinositols	Diacylglycerophosphoinositols	C49H89O13P
939.599	939.5957	0.0036	[M + H]+	0.030288	3.6406e-05	6.74754e-05	0.539545									M940T459	PI(42:6)	Glycerophosphoinositols	Diacylglycerophosphoinositols	C51H87O13P
955.573				0.0064368	0.000248405	0.000421339	0.589561									M956T459	ND	ND	ND	ND
NA: Non attributed (too many possibilities)
ND: Not determined
FC: Fold change
p.adjusted: p-value with FDR correction
