# Supplementary material for: Lipid profile of bovine grade-1 blastocysts produced either in vivo or in vitro before and after slow freezing process
Source: Sci Rep. 2021 Jun 2;11:11618. doi: 10.1038/s41598-021-90870-8 (PMC8172931; doi:10.1038/s41598-021-90870-8)
Supplement: Supplementary file 2 — Supplementary Information 2. [file 41598_2021_90870_MOESM2_ESM.xlsx]

## Sheet: Feuil1
	Article Title : Lipid profile of bovine grade-1 blastocysts produced either in vivo or in vitro before and after slow freezing process
	Authors: Sarah Janati Idrissi1*, Daniel Le Bourhis1, Antoine Lefevre2, Patrick Emond2, Laurene Le Berre1, Olivier Desnoës1, Thierry Joly3,4, Samuel Buff4, Virginie Maillard5, Laurent Schibler1, Pascal Salvetti1, Sebastien Elis5* 1 Allice, 37380 Nouzilly, France; 2 Université de Tours, PST Analyse des systèmes biologiques, 37044 Tours Cedex 9, France; 3 Univ Lyon, Université Claude Bernard Lyon 1,…
	Supplementary Table 2 : Data associated with the O-PLSDA
	Legend:	Eight Holstein heifers enabled the production of in vitro and in vivo embryos by OPU-IVF and embryo collection procedures. After seven days of development, all grade 1 blastocysts were biopsied and sexed. Half of each group underwent lipid extraction in a fresh state, the other half were first frozen before undergoing lipid extraction. Lipid extracts were analysed by liquid chromatography-high re…

## Sheet: Supplementary Table 2
		origin effect: in vivo versus in vitro produced embryos
		freezing effect: fresh versus frozen in vivo produced embryos
		freezing effect: fresh versus frozen in vitro produced embryos
			VITRO VS VIVO FRESH	FRESH VS FROZEN VIVO	FRESH VS FROZEN VITRO
ID	Exact (mz)	Retention time	VIP	VIP	VIP
M1195T745	1194.82	744,901	1,12194
M1200T745	1199.78	744,749	1,16166
M1216T745	1215.75	744,901	1,14807
M1343T825	1342.93	824,604	1,41179
M1348T825	1347.88	824,623	1,51172
M1364T825	1363.86	824,614	1,53543
M256T266	256.227	265,572	1,19376
M256T337	256.227	336,851	1,18221
M264T147	264.254	147,342	1,19162
M269T68	268.865	68,4617	1,24879
M270T270	270.243	269,576	1,19407
M271T270_1	271.227	269,559	1,35545
M272T356	272.222	355,939	1,33726
M272T88	272.222	87,7336	1,25637
M273T253	273.222	253,365	1,11715		1,44306
M273T409	273.258	409,254			1,27432
M275T69	274.881	69,1853	1,35737
M277T69	276.879	69,1856	1,35444
M279T244	279.305	244,477		1,19335
M285T70	284.91	70,0127	1,42025
M287T70	286.907	69,8308	1,34525		1,27668
M287T74	287.09	74,0963	1,16086
M295T70	294.939	70,4791	1,3807		1,30947
M295T248	295.3	248,122		1,23732
M297T244	297.316	244,473		1,15506
M298T338	298.311	337,886	1,16301
M299T170	299.259	169,7		1,17824
M302T70	301.901	70,2662	1,41293
M310T151	310.238	151,322		1,2783
M310T1617	309.976	1616,62	1,53636
M312T71	311.929	71,3063	1,25262
M313T248	313.311	248,254		1,20314
M315T245	315.326	244,53		1,21174
M324T137	324.217	136,547	1,26139
M327T68	326.823	68,1816	1,09145
M336T201	336.311	200,639	1,17752	1,0869
M337T69	336.852	69,1566	1,24868
M345T69	344.866	69,4525	1,12307
M348T255	348.311	254,772	1,04503	1.58198
M349T70	348.878	70,3315	1,28737
M349T238	349.216	237,929		1,26746
M353T70	352.898	70,0338	1,30898
M355T70	354.895	69,9649	1,29123
M357T72	356.91	72,0181	1,42298
M357T328	357.337	328,216		1,11239
M360T70	359.859	69,5959	1,36496
M363T293	363.253	292,672	1,13502
M363T71	362.927	70,5434	1,25557
M368T666	368.389	666,442	1,25377
M369T70	368.872	70,3155	1,38762
M369T254	369.241	254,188		1,67394
M370T75	370.244	75,3559	1,11704
M376T238	376.178	237,929		1,23383
M379T71	378.901	71,0578	1,38661
M379T238	379.231	237,92		1,18718
M379T368	379.283	367,57		1,28313
M380T71	379.917	71,0578	1,35936
M382T691	382.405	690,602	1,39746
M389T142	389.112	142,157	1,13059
M397T329	397.272	329,075		1,0686
M400T139	400.306	139,177	1,13244
M403T238	403.138	237,965		1,2374
M406T285	406.353	285,111	1,09227
M407T70	406.837	69,5674	1,29166
M408T269	408.309	269,491	1,12363
M413T369	413.267	369,11	1,0374
M415T71	414.869	70,5723	1,385
M415T254	415.238	254,097		1,59123
M417T70	416.865	70,4751	1,35184
M421T90	421.318	90,353	1,47233
M423T278	423.218	277,538	1,17484
M424T191	424.364	191,362	1,26079	1,16101
M425T1616	424.825	1615,58	1,46006
M425T72	424.897	71,5816	1,36434
M428T70	427.847	69,6824	1,14164
M432T297	432.369	297,175	1,15679
M432T86	432.238	85,7018	1,10056
M438T216	438.38	216,325	1,05572
M438T238	438.148	237,853		1,24479
M438T70	437.876	70,4316	1,25238		1,17915
M444T137	444.332	136,997	1,06449
M444T682	444.421	682,105	1,05656
M448T71	447.904	71,0092	1,246
M453T313	453.394	312,947		1,78216	1,22394
M458T85	458.234	85,3775	1,06276
M461T568	461.363	567,751	1,18873
M471T483	471.288	483,393		1,1524
M473T70	472.827	69,6748	1,29973
M483T71	482.856	70,5483	1,32954
M483T254	483.225	254,136		1,58384
M485T70	484.853	70,4751	1,2987
M485T191	485.29	191,412		1,15569
M492T528	492.405	527,567	1,18448
M493T71	492.885	71,3187	1,31885
M496T172	496.34	171,677		1,76045	1,68256
M499T568	499.319	568,126		1,1267
M500T254	500.215	254,125		1,6588
M504T132	504.324	132,428		1,20275
M509T132	509.279	132,444	1,0974	1,19727
M516T589	516.426	588,708			1,10444
M517T254	517.205	254,15		1,57614
M518T132	518.34	132,222	1,04322	1,09788
M518T267	518.369	266,929		1,19022
M520T146	520.341	145,536		1,63766	1,50925
M524T235	524.372	235,465		1,70653	1,74769
M525T132	525.253	132,379	1,13497	1,20434
M525T238	525.166	237,919	1,08838
M532T132_1	532.355	132,442	1,61255
M532T132_2	532.384	132,47	1,08357	1,21073
M532T1594	531.866	1594,44	1,14825
M534T157	534.286	157,357	1,08902
M547T132_2	547.355	132,287		1,22492
M547T770	547.346	769,852		1,35045
M554T260	554.177	260,463	1,15328
M555T713	554.552	713,057	1,04724
M556T179	556.443	178,961	1,07657
M561T71	560.872	71,1736	1,2167
M571T132	571.25	132,305	1,14184	1.2019
M577T910	576.536	909,697	1,304
M581T791	580.604	790,56	1,13162
M587T770	587.339	769,764	1,16738	1,32841
M587T915	586.541	915,25	1,17249
M594T387	594.414	387,205	1,22959	1,23161
M608T1102	607.565	1102,19		1,08371
M611T789	610.614	788,95	1,06568
M611T792	611.186	791,894	1,22379
M624T908	624.237	908,282	1,25393	1,26487
M625T313	625.408	312,66		1,82489	1,24452
M628T332	628.196	332,293	1,20867
M629T332	629.197	331,83	1,10323
M633T877	632.505	877,196	1,2105
M637T231	637.305	230,966	1,18952
M638T387	638.378	387,131		1,11681
M643T1101	642.604	1101,35		1,08803
M647T1067	647.46	1067,04		1,14217
M647T313	647.391	312,906		1,80462	1.24115
M648T1101	647.56	1101,1		1,09493
M653T132	653.29	132,058	1,37227	1,22776	1,00822
M654T231	654.333	231,029	1,19232
M664T126	664.464	125,912		1.11251
M664T1101	663.534	1100,93		1,09968
M674T228	674.464	227,79		1,29841
M675T231	675.263	230,879	1,16573		1,01762
M679T228	679.42	227,691		1,29676
M680T825	680.481	824,879	1,16927		1,13366
M685T871	685.205	870,99	1,34426
M687T871	687.203	870,992	1,33119
M698T1002	698.256	1002,03	1,25183	1,44849
M701T1067	701.411	1067,32		1,24973
M702T418	702.214	417,886	1,13226
M709T825	708.512	824,89	1,61047
M724T825	723.512	824,81	1,47698		1,08594
M726T825	726.463	824,73	1,41198
M741T767	740.548	767,117	1,03704	1,08827
M758T960	758.224	960,072	1,18209
M759T960	759.224	960,084	1,20637
M760T960	760.222	960,067	1,21321
M769T852	768.58	852,451	1,04922	1,06873
M770T825	770.415	824,763	1,45125
M772T1093	772.276	1092,71		1,261
M773T1093	773.277	1092,66		1,24971
M774T1093	774.275	1092,59		1,24282
M776T512	776.234	511,58	1,15746
M781T1595	780.812	1594,85	1,07947
M791T1289	790.839	1288,53	1,04307
M795T1351	794.725	1351,35	1,1011
M809T1364	808.741	1364,24	1,01368
M825T1394	824.772	1393,78	1,27248
M828T1376	827.712	1376,1	1,06004
M839T1401	838.788	1401,34	1,20643
M839T1592	838.843	1591,75	1,15902
M846T1179	846.295	1179,32		1,26021
M849T1379	848.773	1378,98	1,23445
M851T1396	850.788	1395,68	1,20651
M853T1411	852.804	1410,82	1,18943
M854T1379	853.728	1378,75	1,03212
M856T1395	855.743	1395,26	1,01026
M935T459	934.643	458,8	1,22224	1,31583
M940T459	939.599	458,77	1,33571
M956T459	955.573	458,808	1,32294	1,28876
VIP: importance of variables in the projection
